# Housing Finance and Monetary Policy

[Get access >](#)

Alessandro Calza, Tommaso Monacelli, Livio Stracca

*Journal of the European Economic Association*, Volume 11, Issue suppl\_1, 1  
January 2013, Pages 101–122, <https://doi.org/10.1111/j.1542-4774.2012.01095.x>

**Published:** 01 January 2013

## Abstract

We document three facts concerning how the structure of housing finance affects the monetary transmission mechanism: first, the characteristics of residential mortgage markets differ markedly across industrialized countries; second, the impact of monetary policy shocks to residential investment and house prices is significantly stronger in those countries with larger flexibility/development of mortgage markets; third, the transmission to consumption is stronger only in those countries where mortgage equity release is common and mortgage contracts are predominantly of the variable-rate type. We then build a two-sector DSGE model with financial constraints to rationalize those facts.

© 2012 by the European Economic Association

**JEL:** [E21 - Consumption; Saving; Wealth](#), [E44 - Financial Markets and the Macroeconomy](#), [E52 - Monetary Policy](#)

**Issue Section:** [Original Articles](#)

You do not currently have access to this article.

## Sign in

 [Get help with access](#)

**European Economic  
Association members**

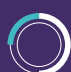

**EUROPEAN ECONOMIC ASSOCIATION**  
Developing and Applying Economics as a Science in Europe

[Sign in through society site >](#)

## Personal account

- Sign in with email/username & password
- Get email alerts
- Save searches
- Purchase content
- Activate your purchase/trial code
- Add your ORCID iD

Sign in >

[Register](#)

## Institutional access

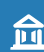

Sign in through your institution

[Sign in through your institution](#)

[Sign in with a library card](#)

[Sign in with username/password](#)

[Recommend to your librarian](#)

## Institutional account management

[Sign in as administrator](#)

## Purchase

[Subscription prices and ordering for this journal](#)

[Purchasing options for books and journals across Oxford Academic](#)

## Short-term Access

To purchase short-term access, please sign in to your personal account above.

Don't already have a personal account? [Register](#)

Housing Finance and Monetary Policy - 24 Hours access

EUR €39.00

GBP £33.00

USD \$43.00

## Rental

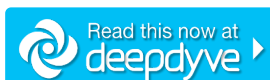

This article is also available for rental through DeepDyve.
