**NEW:** We have upgraded our email alerts. You can sign up using the 'Email alerts' panel available on most pages, or in your Oxford Academic personal account, where you can also manage any existing alerts.

JOURNAL ARTICLE

# Housing Finance and Monetary Policy

Get access >

, ,

*Journal of the European Economic Association*, Volume 11, Issue suppl\_1, 1  
January 2013, Pages 101–122, <https://doi.org/10.1111/j.1542-4774.2012.01095.x>

**Published:** 01 January 2013

## Abstract

We document three facts concerning how the structure of housing finance affects the monetary transmission mechanism: first, the characteristics of residential mortgage markets differ markedly across industrialized countries; second, the impact of monetary policy shocks to residential investment and house prices is significantly stronger in those countries with larger flexibility/development of mortgage markets; third, the transmission to consumption is stronger only in those countries where mortgage equity release is common and mortgage contracts are predominantly of the variable-rate type. We then build a two-sector DSGE model with financial constraints to rationalize those facts.

© 2012 by the European Economic Association

**JEL:** [E21 - Consumption; Saving; Wealth](#), [E44 - Financial Markets and the Macroeconomy](#), [E52 - Monetary Policy](#)

**Issue Section:** [Original Articles](#)

You do not currently have access to this article.

**Sign in**

 [Get help with access](#)

**European Economic Association members**

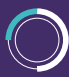

[Sign in through society site >](#)

### Personal account

- Sign in with email/username & password
- Get email alerts
- Save searches
- Purchase content
- Activate your purchase/trial code
- Add your ORCID iD

[Sign in >](#)

[Register](#)

### Institutional access

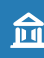

[Sign in through your institution](#)

[Sign in through your institution](#)

[Sign in with a library card](#)

[Sign in with username/password](#)

[Recommend to your librarian](#)

### Institutional account management

[Sign in as administrator](#)

## Purchase

[Subscription prices and ordering for this journal](#)

[Purchasing options for books and journals across Oxford Academic](#)

## Short-term Access

To purchase short-term access, please sign in to your personal account above.

Don't already have a personal account? [Register](#)

Housing Finance and Monetary Policy - 24 Hours access

EUR €39.00

GBP £33.00

USD \$43.00

## Rental

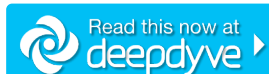

This article is also available for rental through DeepDyve.
